# Supplementary material
Source: PubMed Central journal article supplement (PMC1820658)

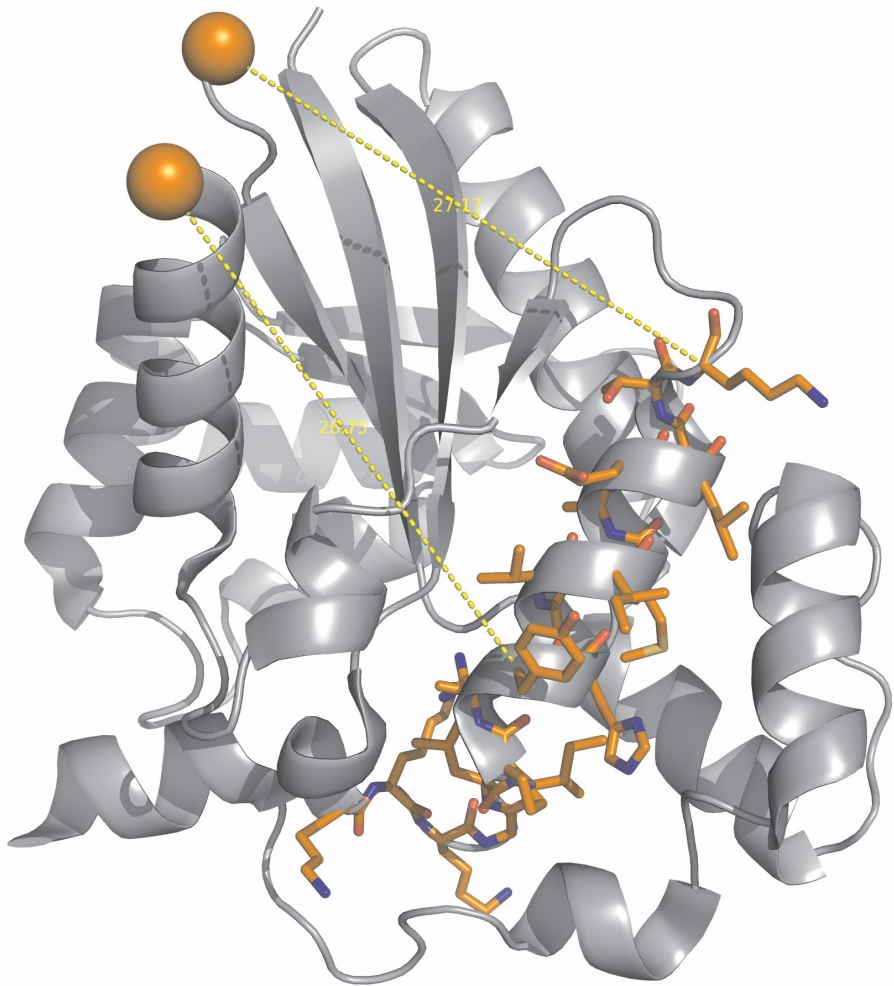

Supplement: pnas_0609211104_1.pdf [file pnas_0609211104_1.pdf]
